# Supplementary material
Source: PubMed Central journal article supplement (PMC2887309)

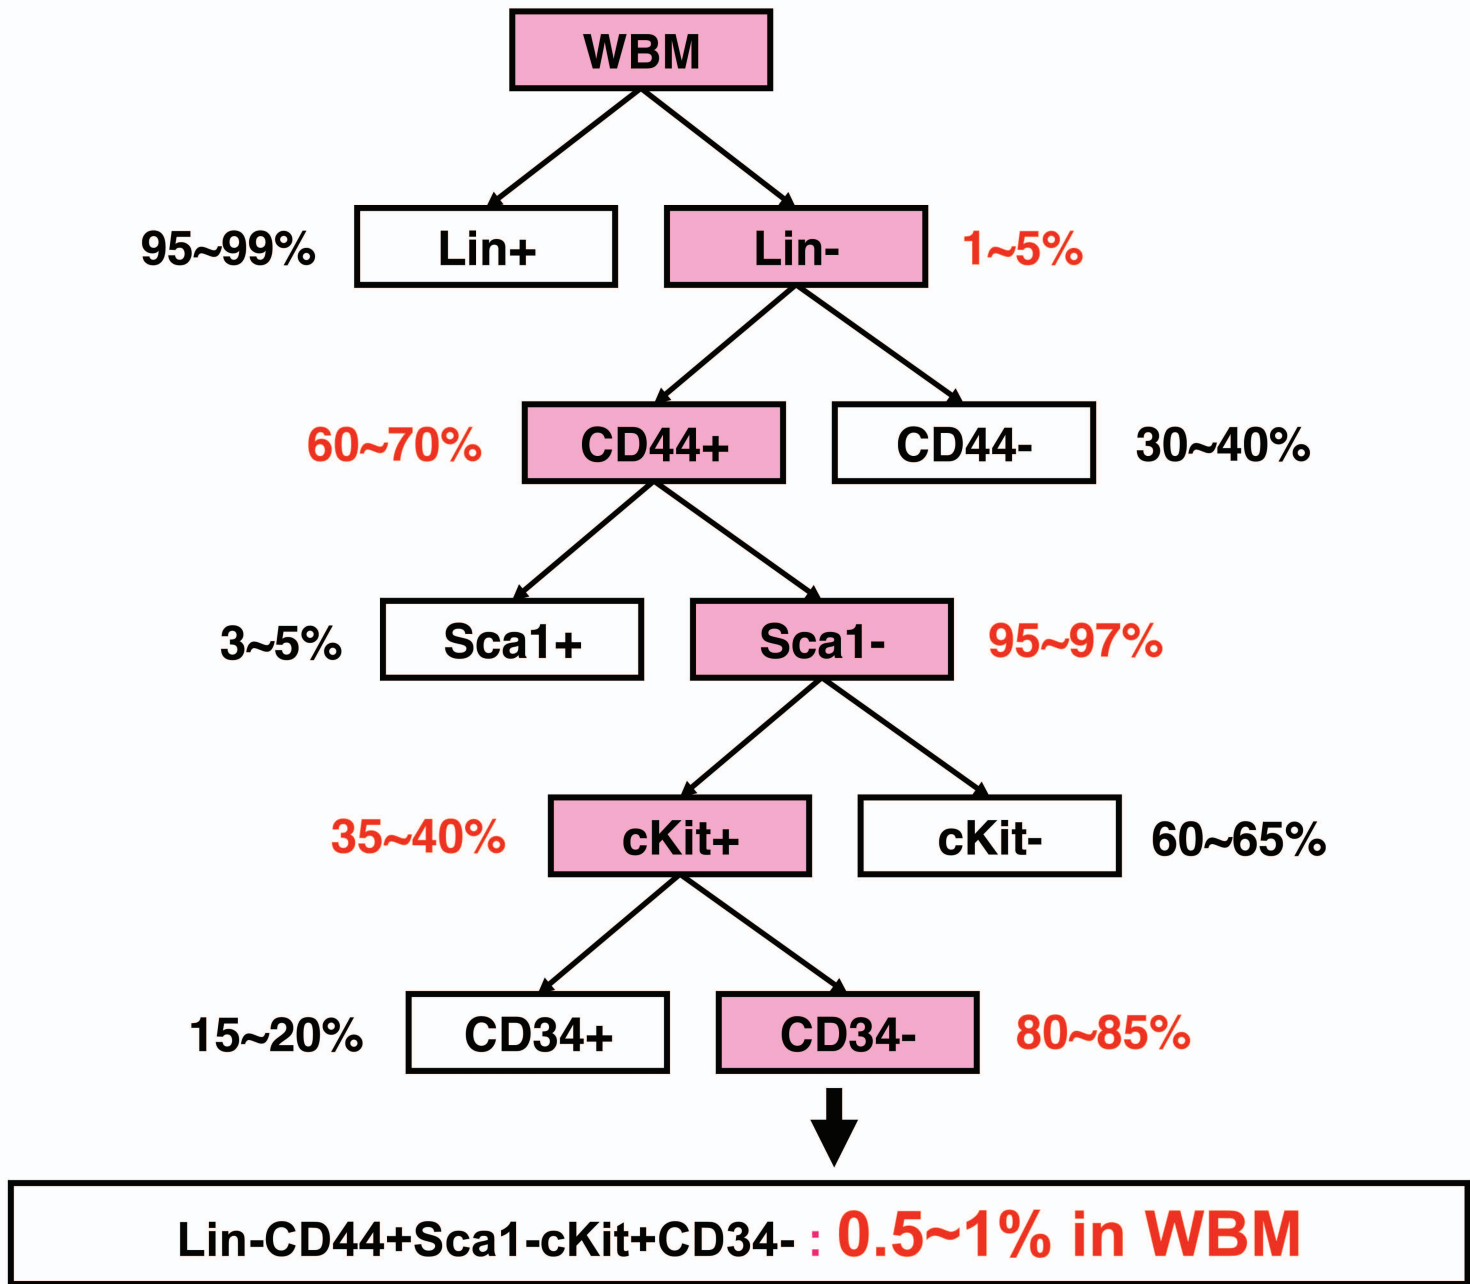

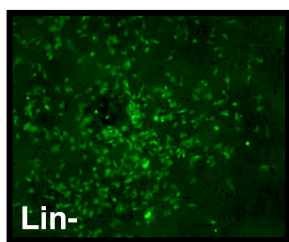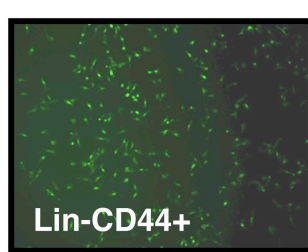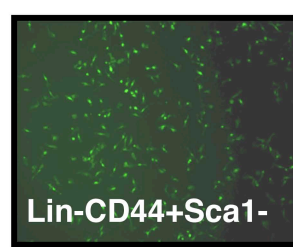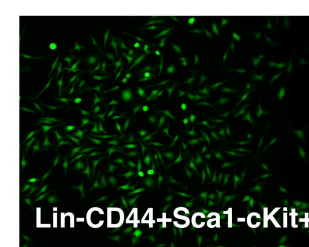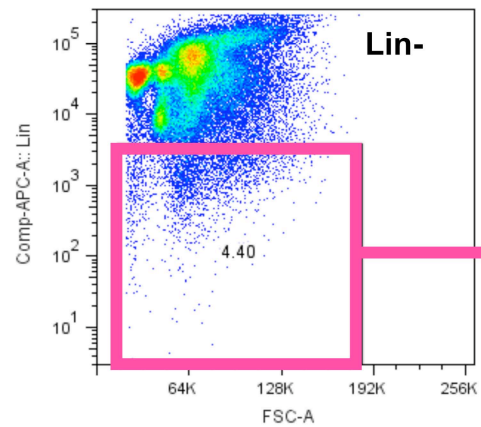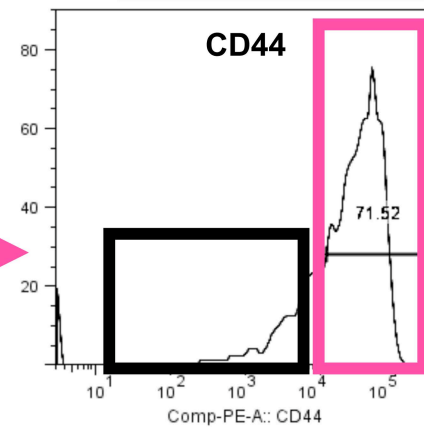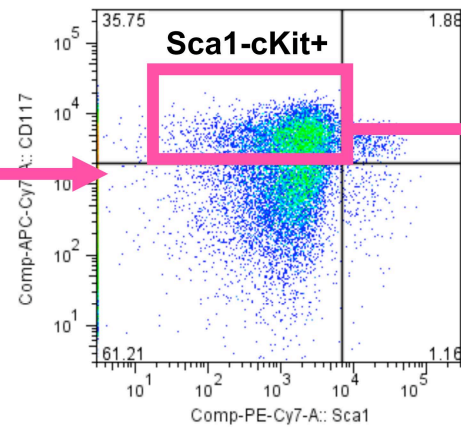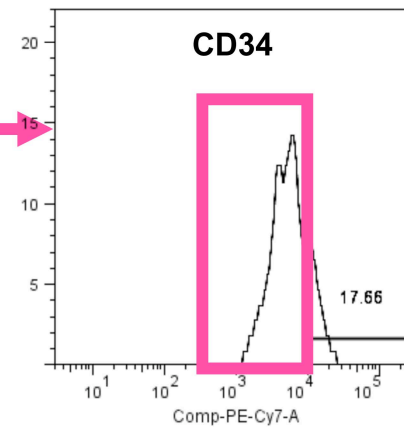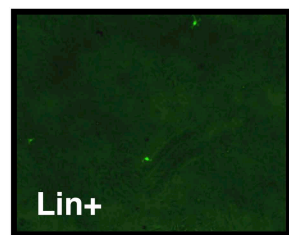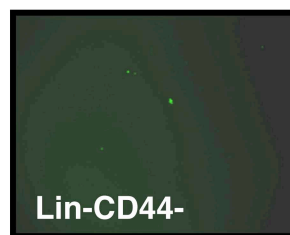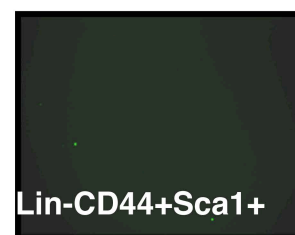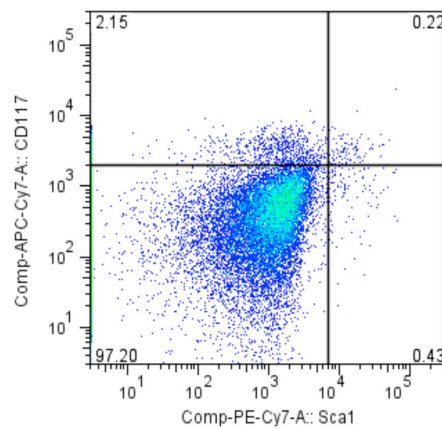

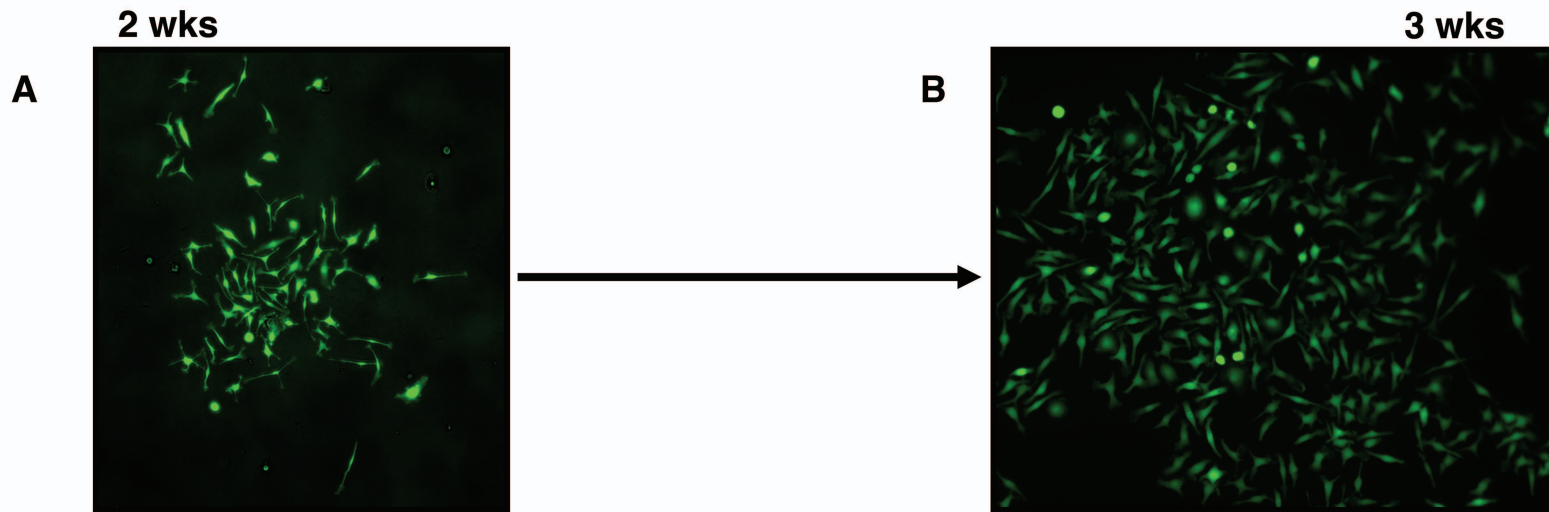

- 21.3% of single cells form CFU-F
  - Average 12.5 colonies out of 58.6 eligible wells.

| <b>Subpopulation in WBM</b>         | <b>1 m/o</b> | <b>6 m/o</b> | <b>12 m/o</b> | <b>18 m/o</b> | <b>28 m/o</b> |
|-------------------------------------|--------------|--------------|---------------|---------------|---------------|
| <b>Lin-CD44+Sca1-cKit+CD34- (%)</b> | <b>0.3</b>   | <b>0.6</b>   | <b>0.58</b>   | <b>0.62</b>   | <b>0.6</b>    |
| <b>Lin-CD44+Sca1+cKit+ (%)</b>      | <b>0.1</b>   | <b>0.07</b>  | <b>0.07</b>   | <b>0.08</b>   | <b>0.1</b>    |

### IL-17A ELISA

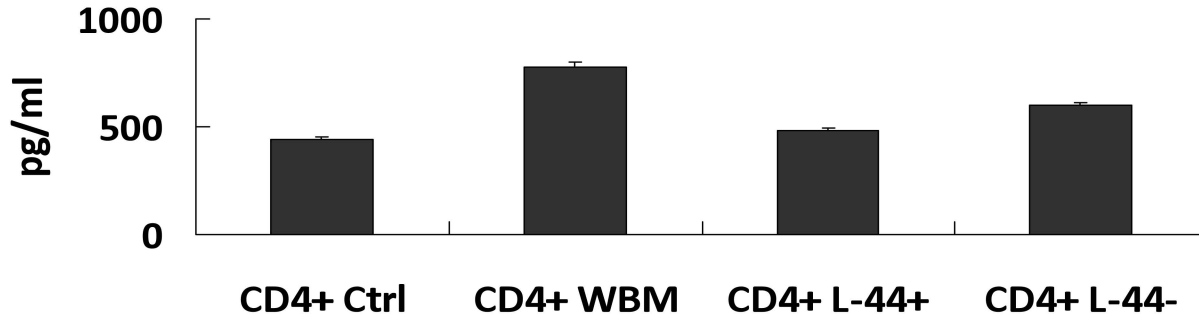

### IL-17F ELISA

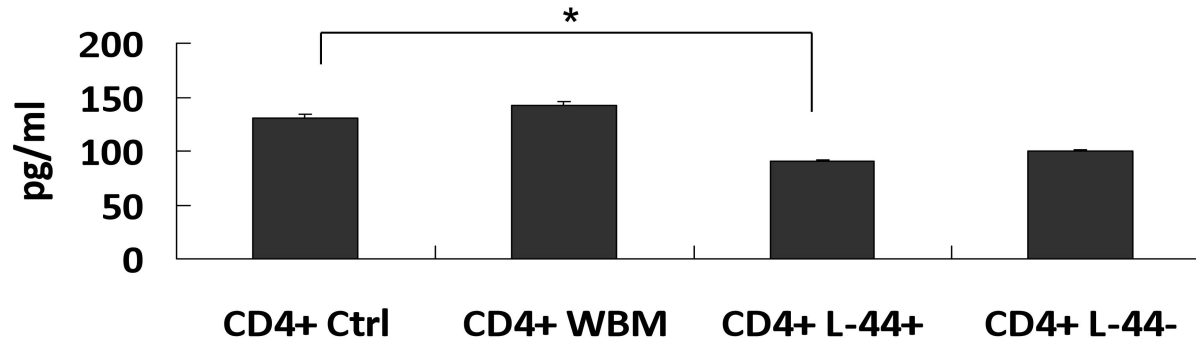

\* p<0.05

### IL-17AF ELISA

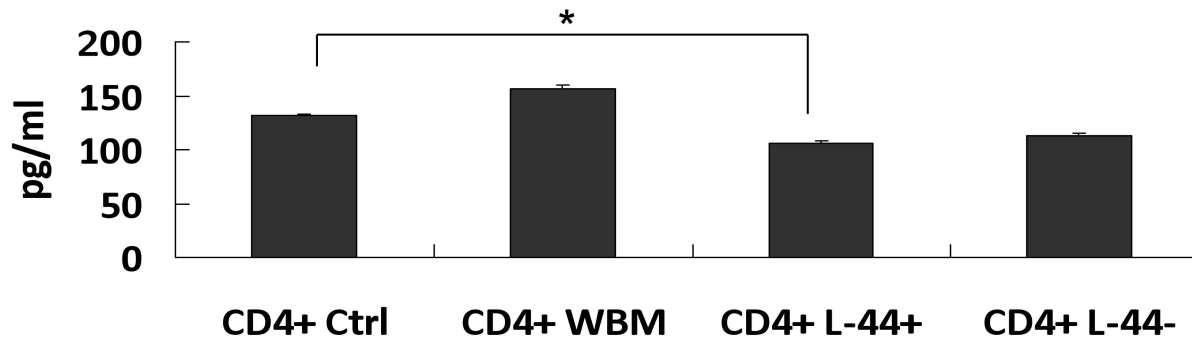

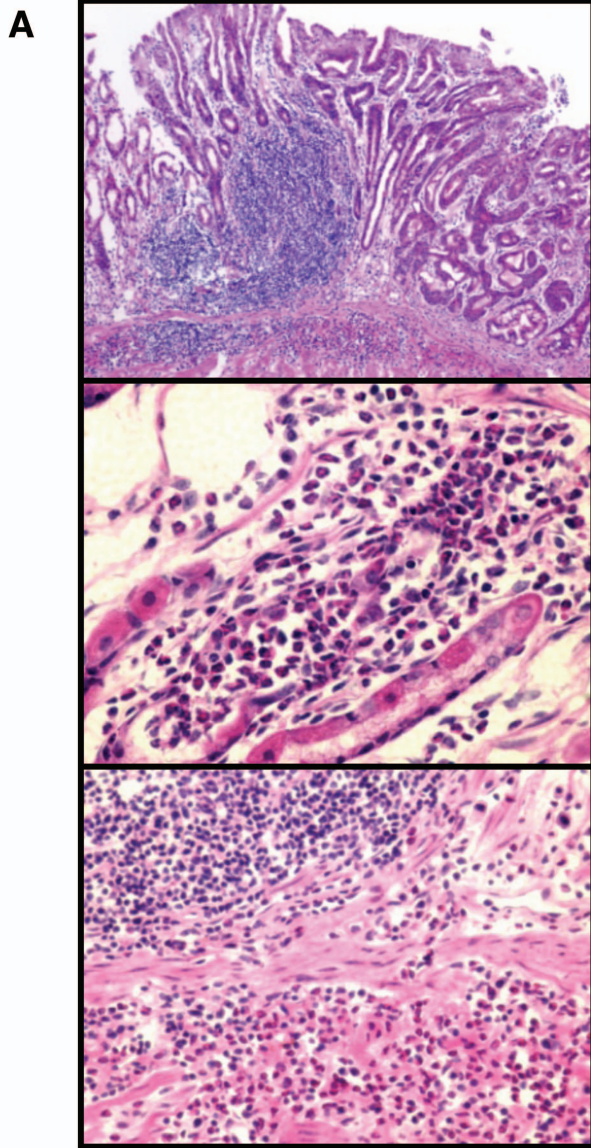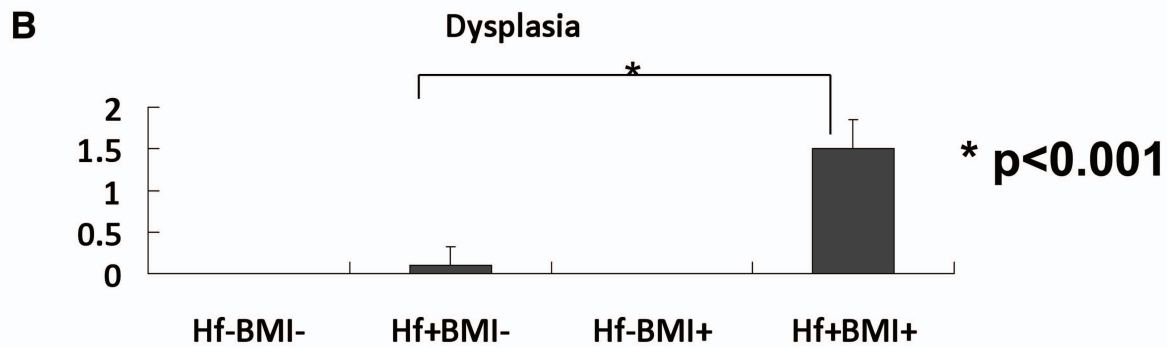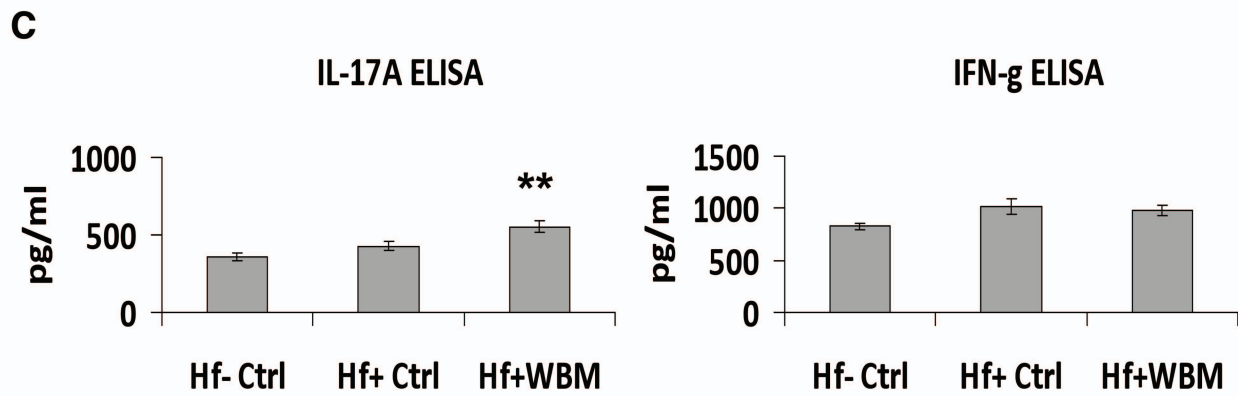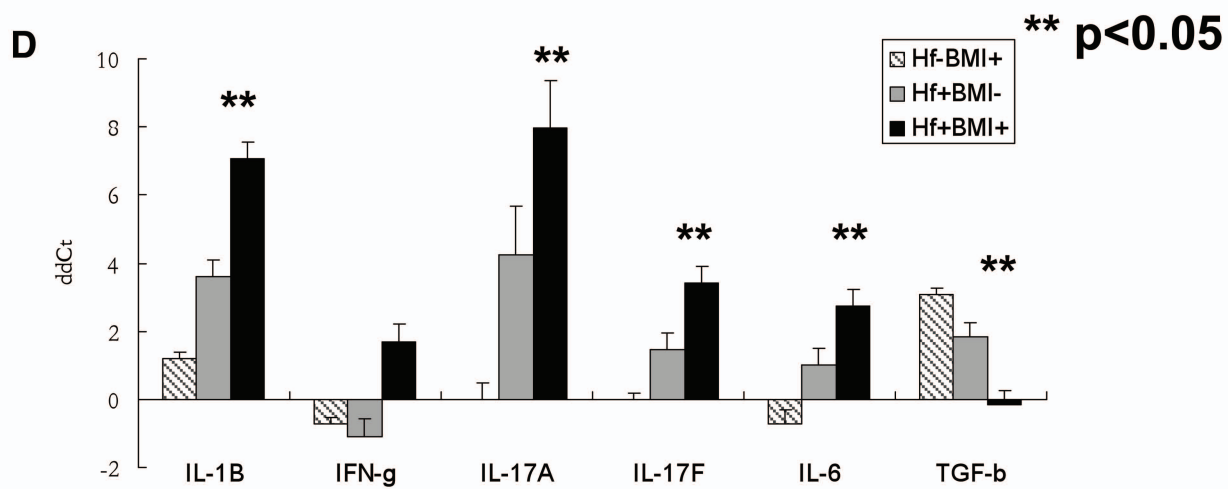

Supplement: NIHMS207443-supplement-suppl_001-006.pdf [file NIHMS207443-supplement-suppl_001-006.pdf]
